# Supplementary material
Source: HighWire-hosted journal article supplement (http://molpharm.aspetjournals.org/highwire/filestream/76786/field_highwire_adjunct_files/14/SupplementrayFig2.pdf)

# Supplementary Figure S2

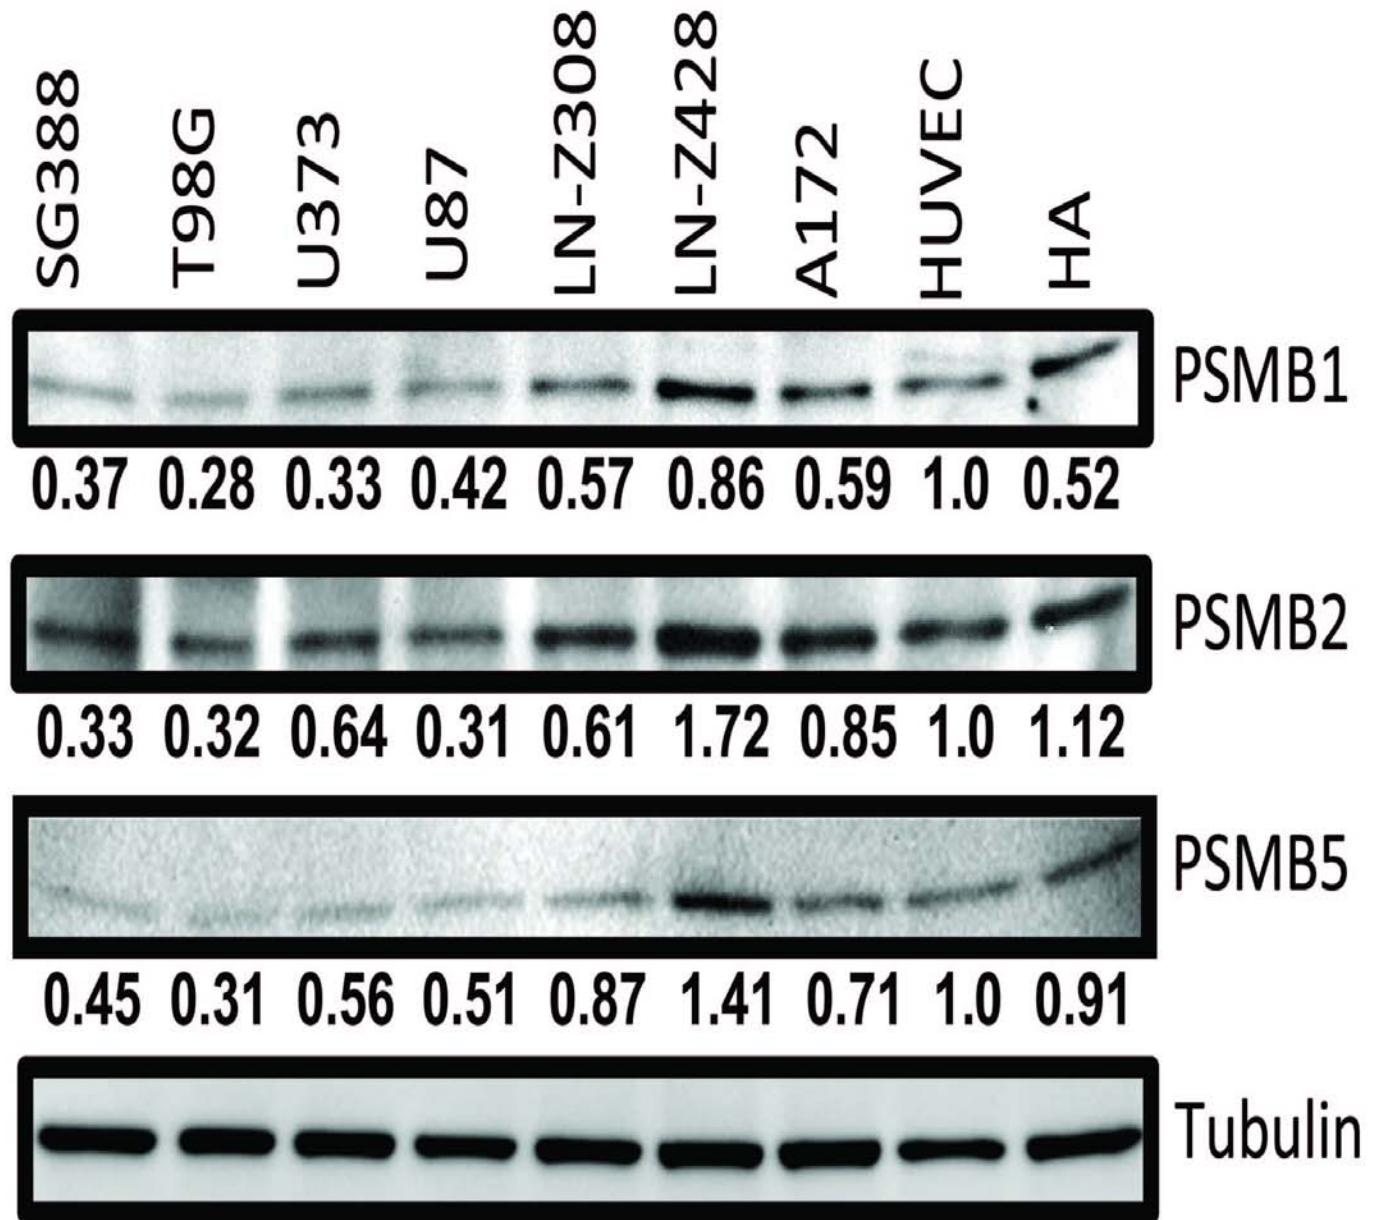

Supplement: SupplementrayFig2.pdf [file SupplementrayFig2.pdf]
